# Supplementary material for: Limited specificity of commercially available SARS-CoV-2 IgG ELISAs in serum samples of African origin
Source: bioRxiv or medRxiv preprint supplement (doi:10.1101/2020.09.15.20159749), 2020-12-01

# STARD Flow Chart

See also Appendix Table 1

all sera collected before COVID-19 pandemic

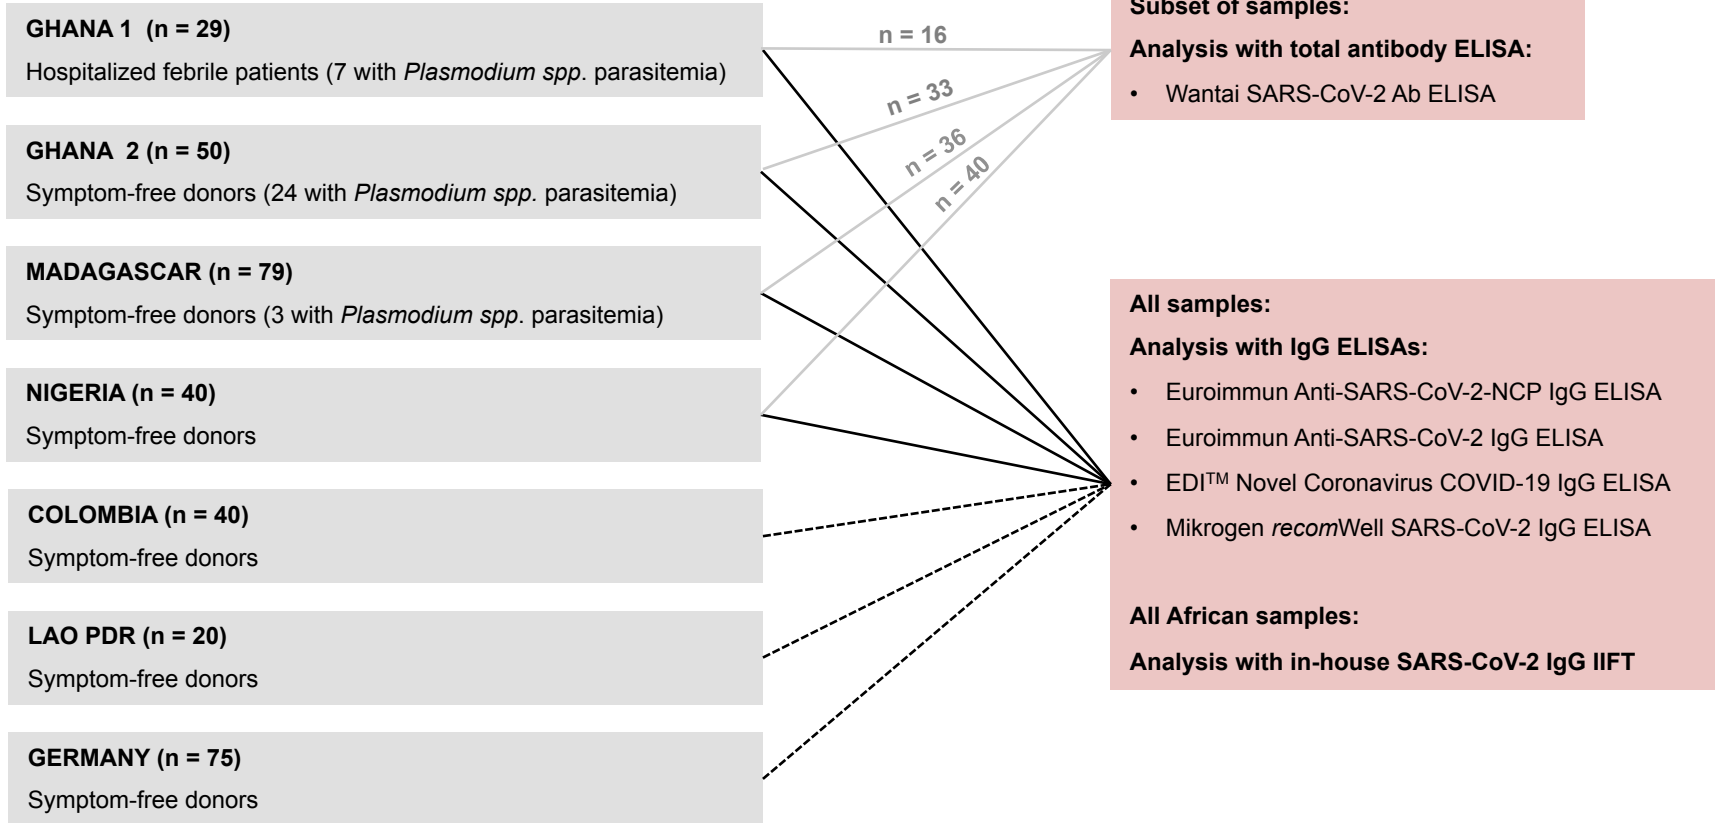

Supplement: Supplementary file [file 2020.09.15.20159749-1.pdf]
