# Supplementary material for: Limited specificity of commercially available SARS-CoV-2 IgG ELISAs in serum samples of African origin
Source: bioRxiv or medRxiv preprint supplement (doi:10.1101/2020.09.15.20159749), 2020-12-01
Supplement: Supplementary file [file 2020.09.15.20159749-2.pdf]

**Appendix Table 1. Serum panels used in the study**

| serum panel       | Ghana 1                                                                                        | Ghana 2                                                                                 | Madagascar                                                                                  | Nigeria             | Colombia            | Lao PDR             | Germany             |
|-------------------|------------------------------------------------------------------------------------------------|-----------------------------------------------------------------------------------------|---------------------------------------------------------------------------------------------|---------------------|---------------------|---------------------|---------------------|
| number            | 29                                                                                             | 50                                                                                      | 79                                                                                          | 40                  | 40                  | 20                  | 75                  |
| sampling year     | 2010 - 2012                                                                                    | 2014 - 2015                                                                             | 2010                                                                                        | 2018                | 2014                | 2014                | 2007 - 2015         |
| sampling site     | Agogo                                                                                          | Agogo                                                                                   | Manakara/<br>Tsiroanomandidy                                                                | Irrua               | Valledupar          | Savannakhet         | Hamburg             |
| sex m/f (n (%))   | 17/12 (59/41)                                                                                  | 25/25 (50/50)                                                                           | 0/79 (0/100)                                                                                | 24/16 (60/40)       | 17/23 (43/57)       | 3/17 (15/85)        | not available       |
| age (median, IQR) | 16 (7 – 23)                                                                                    | 7 (6 – 9)                                                                               | 21 (18 – 29)                                                                                | 34 (7 – 85)*        | 23 (21 – 25)        | 48 (45 – 53)        | not available       |
| remarks           | hospitalized febrile patients; 7 (24 %) presenting with parasitemia ( <i>Plasmodium spp.</i> ) | symptom-free children; 24 (48 %) presenting with parasitemia ( <i>Plasmodium spp.</i> ) | symptom-free pregnant women; 3 (4 %) presenting with parasitemia ( <i>Plasmodium spp.</i> ) | symptom-free donors | symptom-free donors | symptom-free donors | symptom-free donors |

M: male, f: female, IQR: interquartile range.

All studies complied with the Declaration of Helsinki. Written informed consent was obtained from all individuals or, in case of minors, from parents or legal guardians before enrollment. Data privacy protection was guaranteed by anonymization of samples. Collection of samples has been approved by the Ethics Committees of the Kwame Nkrumah University of Science and Technology, Kumasi/Ghana (CHRPE/AP/427/13 and CHRPE/101/09), the Comité d'éthique de la Vice Primature Chargée de la Santé Publique, Antananarivo/Madagascar (No. 051-CE/MINSAN), the Irrua Specialist Teaching Hospital, Irrua/Nigeria (ISTH/HREC/20171019/28), the Hospital Rosario Pumarejo de Lopez of Valledupar/Colombia, the Lao People's Democratic Republic (No. 030/NECHR), and the Medical Association Hamburg/Germany (No. PV4608)

\*n=39 (age information not available for one donor)

**Appendix Table 2. Commercially available ELISA kits used in the study**

|                                        | <b>Euroimmun Anti-SARS-CoV-2-NCP-ELISA IgG</b>                                     | <b>Euroimmun Anti-SARS-CoV-2-ELISA IgG</b>                                         | <b>EDJ™ Novel Coronavirus COVID-19 IgG ELISA kit</b>                               | <b>Mikrogen recomWell SARS-CoV-2 IgG</b>                                           | <b>Wantai SARS-CoV-2 Ab ELISA</b>                                              |
|----------------------------------------|------------------------------------------------------------------------------------|------------------------------------------------------------------------------------|------------------------------------------------------------------------------------|------------------------------------------------------------------------------------|--------------------------------------------------------------------------------|
| <b>manufacturer</b>                    | Euroimmun AG<br>Lübeck, Germany                                                    | Euroimmun AG<br>Lübeck, Germany                                                    | Epitope Diagnostics, Inc.<br>San Diego, US                                         | Mikrogen GmbH<br>Neuried, Germany                                                  | Wantai BioPharm Ltd.<br>Beijing, China                                         |
| <b>status</b>                          | CE-IVD                                                                             | CE-IVD, FDA EUA                                                                    | CE-IVD                                                                             | CE-IVD                                                                             | CE-IVD                                                                         |
| <b>antibody isotype</b>                | IgG                                                                                | IgG                                                                                | IgG                                                                                | IgG                                                                                | total antibody                                                                 |
| <b>test format</b>                     | 96 well microplate                                                                 | 96 well microplate                                                                 | 96 well microplate                                                                 | 96 well microplate                                                                 | 96 well microplate                                                             |
| <b>test principle</b>                  | indirect ELISA                                                                     | indirect ELISA                                                                     | indirect ELISA                                                                     | indirect ELISA                                                                     | antigen sandwich                                                               |
| <b>antigen</b>                         | NCP (modified)                                                                     | spike (S1 domain)                                                                  | NCP (recombinant)                                                                  | NCP (recombinant)                                                                  | not specified in IFU; spike RBD (4)                                            |
| <b>sample dilution</b>                 | 1:101                                                                              | 1:101                                                                              | 1:101                                                                              | 1:101                                                                              | none (undiluted serum)                                                         |
| <b>interpretation index value (iv)</b> | negative: $iv < 0.8$<br>borderline: $0.8 \leq iv < 1.1$<br>positive: $iv \geq 1.1$ | negative: $iv < 0.8$<br>borderline: $0.8 \leq iv < 1.1$<br>positive: $iv \geq 1.1$ | negative: $iv \leq 0.9$<br>borderline: $0.9 < iv < 1.1$<br>positive: $iv \geq 1.1$ | negative: $iv < 1.0$<br>borderline: $1.0 \leq iv < 1.2$<br>positive: $iv \geq 1.2$ | negative: $iv < 1$<br>borderline: $0.9 \leq iv < 1.1$<br>positive: $iv \geq 1$ |
| <b>references</b>                      | (7)                                                                                | (4-8)                                                                              | (5,6)                                                                              | (5)                                                                                | (4, 7, 8)                                                                      |

CE: Conformité Européenne, IVD: *in vitro* diagnostics; FDA: Food and Drug Administration; EUA: Emergency Use Authorization; NCP: nucleocapsid protein; RBD: receptor binding domain; IFU: Instructions for Use

**Appendix Table 3. SARS-CoV-2 IgG ELISA specificities for donor subgroups with different health status**

|                 |                        |                      |    | Euroimmun Anti-SARS-CoV-2-NCP-ELISA IgG | Euroimmun Anti-SARS-CoV-2-ELISA IgG | EDI™ Novel Coronavirus COVID-19 IgG ELISA kit | Mikrogen recomWell SARS-CoV-2 IgsG |                    |   |    |                    |   |    |                     |   |    |
|-----------------|------------------------|----------------------|----|-----------------------------------------|-------------------------------------|-----------------------------------------------|------------------------------------|--------------------|---|----|--------------------|---|----|---------------------|---|----|
| Ghana<br>(n=79) | parasitemic (n=31)     | pos                  | bl | neg                                     | 5                                   | 1                                             | 25                                 | 3                  | 1 | 27 | 6                  | 6 | 19 | 1                   | 1 | 29 |
|                 |                        | specificity (95% CI) |    |                                         | 83.9 (66.9 – 93.4)                  |                                               |                                    | 90.3 (74.3 – 97.4) |   |    | 80.6 (63.3 – 91.2) |   |    | 96.8 (82.4 – 100.0) |   |    |
|                 | not parasitemic (n=48) | pos                  | bl | neg                                     | 4                                   | 2                                             | 42                                 | 4                  | 2 | 42 | 10                 | 3 | 35 | 4                   | 1 | 43 |
|                 |                        | specificity (95% CI) |    |                                         | 91.7 (79.9 – 97.2)                  |                                               |                                    | 91.7 (79.9 – 97.2) |   |    | 79.2 (65.6 – 88.5) |   |    | 91.7 (79.9 – 97.2)  |   |    |
| Ghana<br>(n=79) | febrile (n=29)         | pos                  | bl | neg                                     | 2                                   | 0                                             | 27                                 | 2                  | 3 | 24 | 10                 | 4 | 15 | 2                   | 0 | 27 |
|                 |                        | specificity (95% CI) |    |                                         | 93.1 (77.0 – 99.1)                  |                                               |                                    | 93.1 (77.0 – 99.1) |   |    | 65.5 (47.3 – 80.1) |   |    | 93.1 (77.0 – 99.1)  |   |    |
|                 | symptom-free (n=50)    | pos                  | bl | neg                                     | 7                                   | 3                                             | 40                                 | 5                  | 0 | 45 | 6                  | 5 | 39 | 3                   | 2 | 45 |
|                 |                        | specificity (95% CI) |    |                                         | 86.0 (73.5 – 93.4)                  |                                               |                                    | 90.0 (78.2 – 96.1) |   |    | 88.0 (75.8 – 94.7) |   |    | 94.0 (83.2 – 98.6)  |   |    |

pos/bl/neg: number of samples rated as positive (pos), borderline (bl), and negative (neg) by the respective test. CI: confidence interval. For calculation of specificities, both negative and borderline results were classified as “not positive”.

# Appendix Figure 1

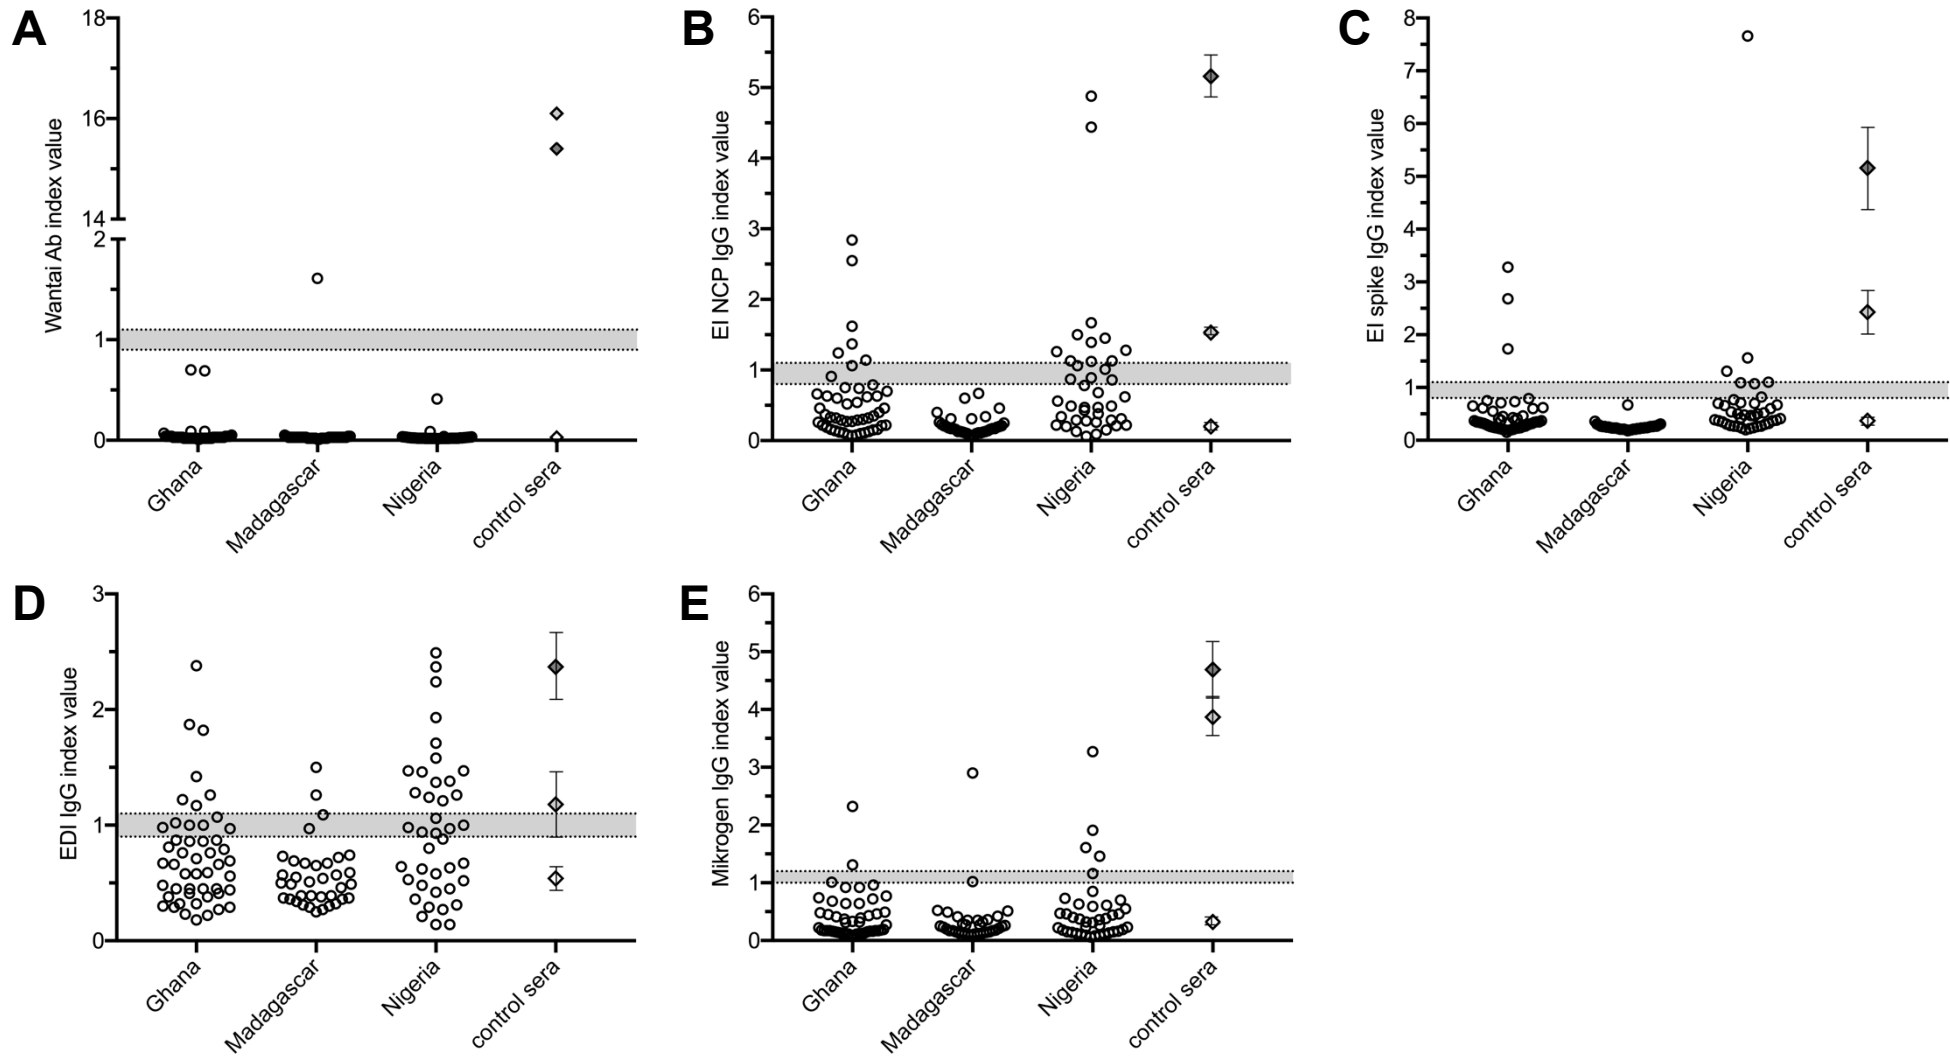

**Appendix Figure 1. Wantai SARS-CoV-2 Ab ELISA results.** The complete Nigerian serum panel (n=40) as well as subsets of the Ghanaian (n=49) and the Madagascar (n=36) serum panels were analyzed using the Wantai SARS-CoV-2 Ab ELISA (A). Results obtained for the respective panel/subsets with (B) the Euroimmun Anti-SARS-CoV-2-NCP IgG ELISA, (C) the Euroimmun Anti-SARS-CoV-2 IgG ELISA, (D) the EDI Novel Coronavirus COVID-19 IgG ELISA, and (E) the Mikrogen *recomWell* SARS-CoV-2 IgG ELISA are displayed for comparison.
